# Supplementary material
Source: PubMed Central journal article supplement (PMC6453225)
Supplement: Suplementary-table.pdf [file Suplementary-table.pdf]

## Patient Ethnicity and Incidence of Stroke

### Supplemental Table 1: Prognosis at discharge and 90- days

#### Prognosis at discharge: P<0.0001

| Modified Rankin Score | Total<br>n=1710 (82.3%) | Ischemic Stroke/TIA<br>n=1407 (82.3%) | ICH<br>n=303 (17.7%) |
|-----------------------|-------------------------|---------------------------------------|----------------------|
| 0                     | 452 (26.4)              | 435 (30.9)                            | 17 (5.6)             |
| 1                     | 420 (24.6)              | 372 (26.4)                            | 48 (15.8)            |
| 2                     | 198 (11.6)              | 171 (12.2)                            | 27 (8.9)             |
| 3                     | 241 (14.1)              | 190 (13.5)                            | 51 (16.8)            |
| 4                     | 223 (13.0)              | 153 (10.9)                            | 70 (23.1)            |
| 5                     | 112 (6.5)               | 62 (4.4)                              | 50 (16.5)            |
| 6                     | 64 (3.7)                | 24 (1.7)                              | 40 (13.2)            |

#### Prognosis at 90- days: P<0.0001

| Modified Rankin Score | Total<br>n=1588 (%) | Ischemic Stroke/TIA<br>n=1318 (83.0%) | ICH<br>n=270 (17.0%) |
|-----------------------|---------------------|---------------------------------------|----------------------|
| 0                     | 592 (37.3)          | 553 (42.0)                            | 39 (14.4)            |
| 1                     | 413 (26.0)          | 363 (27.5)                            | 50 (18.5)            |
| 2                     | 201 (12.7)          | 159 (12.1)                            | 42 (15.6)            |
| 3                     | 109 (6.9)           | 80 (6.1)                              | 29 (10.7)            |
| 4                     | 102 (6.4)           | 76 (5.8)                              | 26 (9.6)             |
| 5                     | 88 (5.5)            | 48 (3.6)                              | 40 (14.8)            |
| 6                     | 83 (5.2)            | 39 (3.0)                              | 44 (16.3)            |
